# Supplementary material for: Nanowires with dislocations for ultralow lattice thermal conductivity
Source: Royal Society of Chemistry journal article supplement (doi:10.1039/c6cp00630b), 2016-01-01
Supplement: c6cp00630b3.pdf [file c6cp00630b3.pdf]

**Video Caption.** Molecular dynamics simulation of a  $\langle 100 \rangle$ 1b PbSe nanowire without Eshelby's twist. The gray and yellow atoms are Pb and Se atoms, respectively. The red arrows denote the position of dislocation line, which is in  $\langle 100 \rangle$  direction (z direction). The length of the cell in z direction is 12 nm and periodic boundary conditions are applied in z direction. The dislocation line quickly migrates to the surface, leaving behind the pristine NW structure.
